# Supplementary material for: A MXene-supported single atom catalyst selectively converts CO 2 into methanol and methane
Source: Royal Society of Chemistry journal article supplement (doi:10.1039/d4su00747f), 2025-01-01
Supplement: d4su00747f1.pdf [file d4su00747f1.pdf]

## Supporting Information

### **MXene-Supported Single Atom Catalyst Selectively Converts CO<sub>2</sub> into Methanol and Methane†**

*Hasan Al-Mahayni<sup>a</sup>, Rongyu Yuan<sup>a</sup>, Ali Seifitokaldani<sup>\*a</sup>*

<sup>a</sup> Department of Chemical Engineering, McGill University, Montreal, Quebec, Canada. H3A 0C5

\* Corresponding author: [ali.seifitokaldani@mcgill.ca](mailto:ali.seifitokaldani@mcgill.ca)

### Computational details:

To compute energy differences of elementary proton coupled electron transfer (PCET) steps, the computational hydrogen electrode (CHE) model was used <sup>1</sup>:

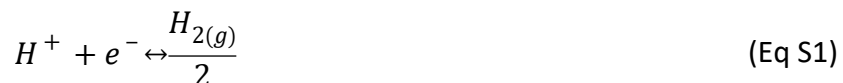

$$E_{H^+ + e^-} = \frac{E_{H_{2(g)}}}{2}, @pH=0 \text{ and } 1 \text{ atm} \quad (\text{Eq S2})$$

To calculate the formations energy from Eq (1) of the manuscript, the energy of Oxygen (O) must be calculated. Using the DFT energy of O<sub>2</sub> and dividing by 2 to obtain the energy of O has been shown to be inaccurate<sup>2</sup>. Thus, we use the benchmarked Gibbs formation energy <sup>3</sup> of H<sub>2</sub>O<sub>(g)</sub> to back-calculate the energy of O. The equations below were used:

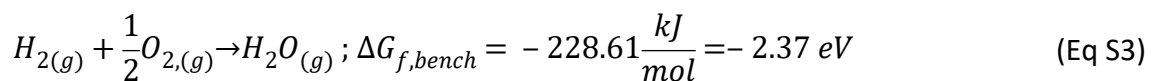

$$E_{O,correction} = 0.57 \text{ eV} \quad (\text{Eq S4})$$

To obtain the correction energy for the oxygen atom, we calculate (from DFT simulations) the Gibbs formation energy of the reaction in Eq S3, which was  $\Delta G_{f,sim} = -2.94 \text{ eV}$ . We then take the simulated  $\Delta G_{f,sim}$  and subtract  $\Delta G_{f,bench}$  to get the correction energy.

To convert DFT energies to Gibbs free energy, the ASE thermochemistry module was used <sup>4</sup>. Specifically, the Gibbs free energy of adsorbed intermediates and liquid products were approximated using the harmonic module, while gaseous reactants and products were

approximated using the ideal gas model at 1atm and room temperature (298.15 K). The equations for the harmonic model are below.

$$U(T) = E_{DFT} + E_{ZPE} + \sum_i^{\text{harm DOF}} \frac{\epsilon_i}{e^{\frac{\epsilon_i}{k_B T}} - 1} \quad (\text{Eq S5})$$

$$S = k_B \sum_i^{\text{harm DOF}} \left[ \frac{\epsilon_i}{e^{\frac{\epsilon_i}{k_B T}} - 1} - \ln \left( 1 - e^{-\frac{\epsilon_i}{k_B T}} \right) \right] \quad (\text{Eq S6})$$

$$G(T) = U(T) - TS(T) \quad (\text{Eq S7})$$

The equations for the ideal gas model are below:

$$H(T) = E_{DFT} + E_{ZPE} + \int_0^T C_p dT \quad (\text{Eq S8})$$

$$C_p = k_B + C_{V,trans} + C_{V,rot} + C_{V,vib} + C_{v,elec} \quad (\text{Eq S9})$$

$$S(T,P) = S_{trans} + S_{rot} + S_{elec} + S_{vib} - k_B \ln \left( \frac{P}{P^0} \right) \quad (\text{Eq S10})$$

$$G(T,P) = H(T) - TS(T,P) \quad (\text{Eq S11})$$

To calculate reaction energy differences from a PCET step:

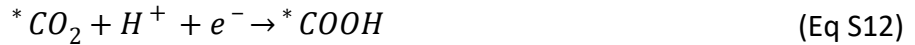

$$\Delta E_{DFT} = E_{{}^*COOH} - E_{{}^*CO_2} - \frac{E_{H_2}}{2} \quad (\text{Eq S13})$$

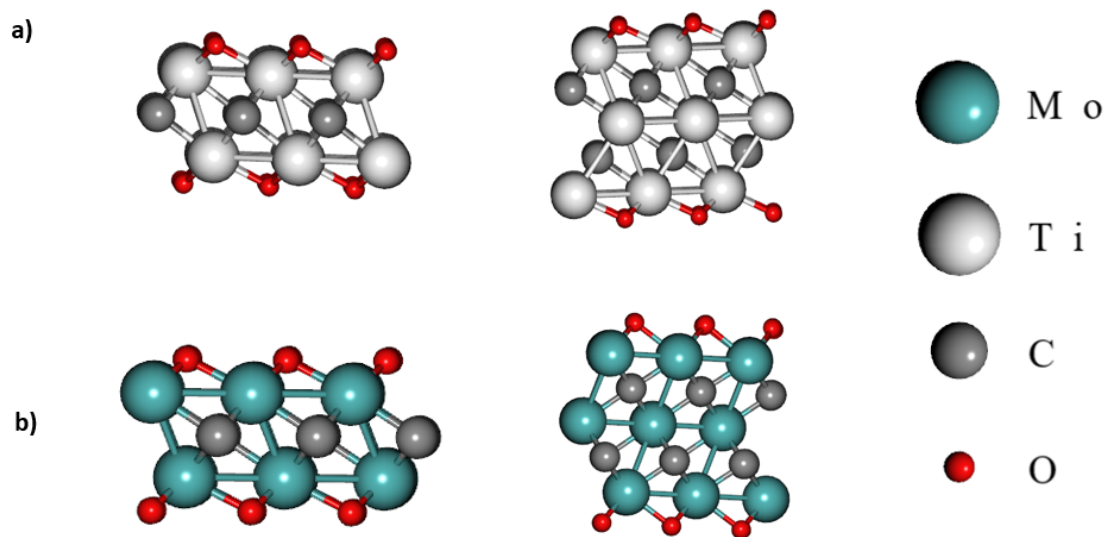

**Figure S1.** Four MXene supports that are used in this paper. (a) left:  $\text{Ti}_{18}\text{C}_9\text{O}_{18}$ ; right:  $\text{Ti}_{27}\text{C}_{18}\text{O}_{18}$

(b) left:  $\text{Mo}_{18}\text{C}_9\text{O}_{18}$ ; right:  $\text{Mo}_{27}\text{C}_{18}\text{O}_{18}$ .

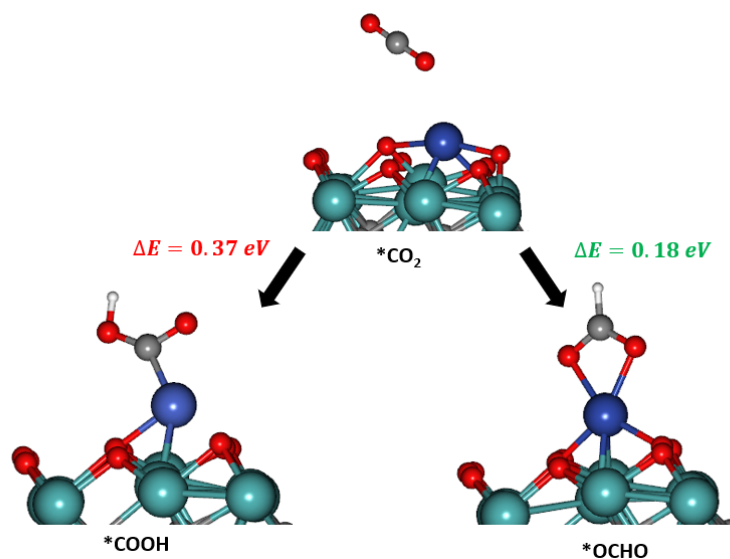

**Figure S2.** CO<sub>2</sub> protonation to OCHO or COOH on Ru@Mo<sub>2</sub> catalyst

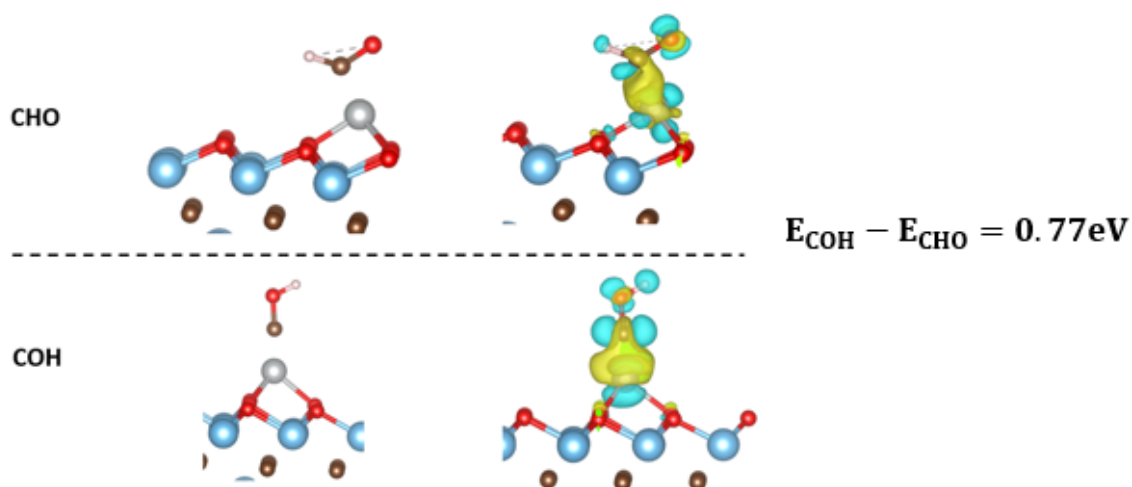

Figure S3. Charge delocalization of \*CHO and \*COH on Ni@Ti3. Blue color indicates areas where electrons are lost whereas yellow color indicates the opposite.

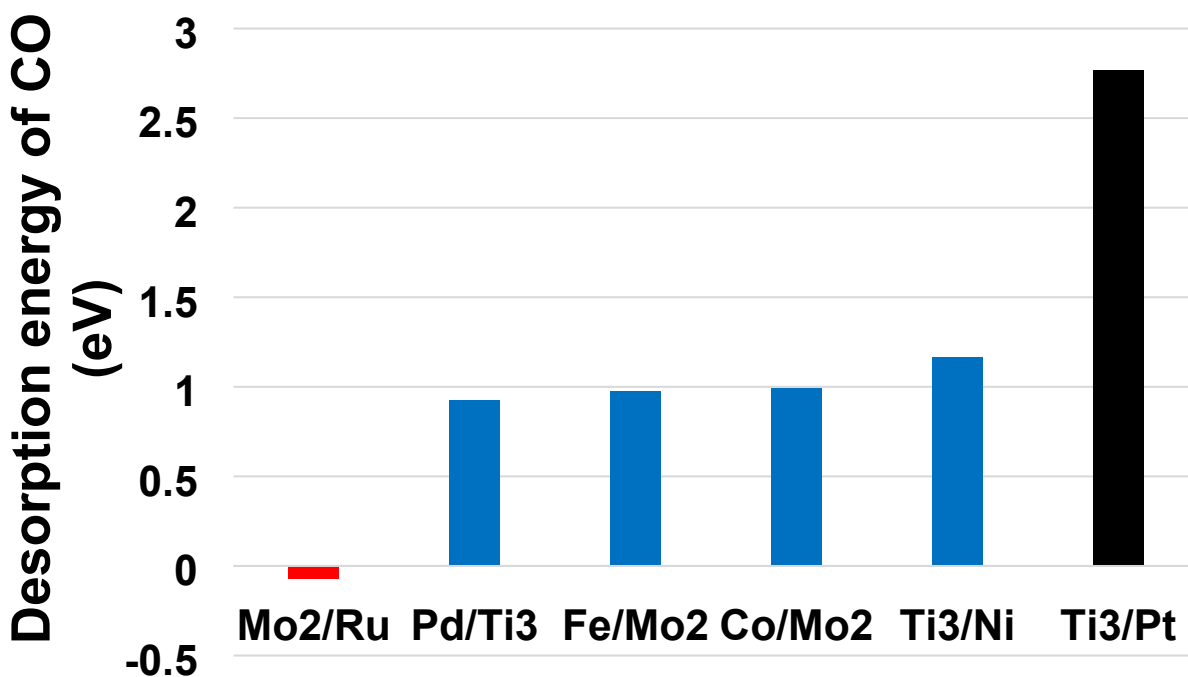

Figure S4. CO desorption energy (in Gibbs free energy) of the six selected catalysts.

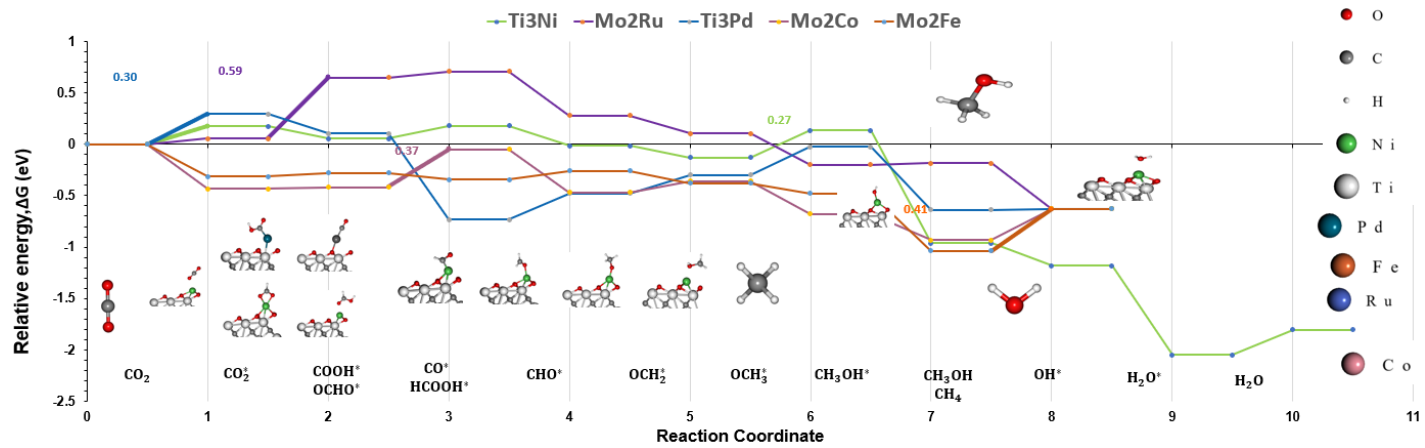

Figure S5. Energy diagram of the five final catalysts.

**Table S1.** Results comparing the HER and CO<sub>2</sub>RR.

| structure | CO <sub>2</sub> * | OCHO*  | HCOOH* | CHO*         | OCH <sub>2</sub> * | OCH <sub>3</sub> * | CH <sub>3</sub> OH | RDS                       | RDS-barrier | H*            | Conclusion            |
|-----------|-------------------|--------|--------|--------------|--------------------|--------------------|--------------------|---------------------------|-------------|---------------|-----------------------|
| Ti2/Co    | -0.417            | -0.878 | 0.272  | -0.197       | -0.080             | -0.691             | <b>0.513</b>       | Ti2-Co-CH <sub>3</sub> OH | 0.513       | -0.238        | Co@Mo2 Better         |
| Ti2/Cu    | -0.492            | -0.217 | -0.453 | <b>0.946</b> | -1.195             | -0.322             | 0.255              | Ti2-Cu-CHO                | 0.946       | -0.032        | HER, High RDS barrier |
| Ti2/Fe    | -0.390            | -1.357 | 0.497  | -0.073       | -0.343             | -0.890             | <b>1.078</b>       | Ti2-Fe-CH <sub>3</sub> OH | 1.078       | -0.412        | HER, High RDS barrier |
| Ti2/Pt    | -0.619            | -0.881 | -0.404 | 0.193        | -0.378             | -0.193             | 0.803              | Ti2-Pt-CH <sub>3</sub> OH | 0.803       | -0.880        | HER, High RDS barrier |
| Ti2/Ru    | -0.280            | -1.607 | 0.356  | -0.059       | -0.666             | -0.203             | 0.983              | Ti2-Ru-CH <sub>3</sub> OH | 0.983       | -0.893        | HER, High RDS barrier |
| Ti2/Ni    | -0.331            | -0.249 | -0.380 | 0.600        | -0.656             | -0.087             | -0.375             | Ti2-Ni-CHO                | 0.600       | <b>0.540</b>  | HER, Ni@Ti3 is better |
| Ti3/Co    | -0.775            | -0.852 | 0.158  | -0.084       | -0.191             | -0.564             | 0.830              | Ti3-Co-CH <sub>3</sub> OH | 0.830       | -0.574        | High RDS barrier      |
| Ti3/Cu    | -0.893            | 0.008  | -0.755 | 1.124        | -1.331             | -0.027             | 0.394              | Ti3-Cu-CHO                | 1.124       | <b>0.118</b>  | Other Cu is better    |
| Ti3/Fe    | -0.733            | -1.371 | 0.297  | 0.154        | -0.405             | -0.735             | 1.315              | Ti3-Fe-CH <sub>3</sub> OH | 1.315       | -0.692        | High RDS barrier      |
| Ti3/Pt    | -1.508            | -0.362 | -0.165 | -0.047       | 0.079              | -0.125             | 0.650              | Ti3-Pt-CH <sub>3</sub> OH | 0.650       | <b>-1.155</b> | Good                  |
| Ti3/Ru    | -0.581            | -1.693 | 0.292  | 0.048        | -0.099             | -0.766             | 1.321              | Ti3-Ru-CH <sub>3</sub> OH | 1.321       | -1.172        | High RDS barrier      |
| Ti3/Ni    | -0.318            | -0.463 | -0.217 | 0.352        | -0.424             | -0.077             | -0.331             | Ti3-Ni-CHO                | 0.352       | <b>0.468</b>  | Good                  |
| Mo2/Co    | -0.920            | -0.317 | 0.024  | 0.147        | -0.263             | -0.636             | 0.487              | Mo2-Co-CH <sub>3</sub> OH | 0.487       | <b>0.019</b>  | Good                  |
| Mo2/Cu    | -0.138            | -0.385 | -0.729 | 1.197        | -1.183             | -0.163             | -0.077             | Mo2-Cu-CHO                | 1.197       | <b>0.462</b>  | High RDS barrier      |
| Mo2/Fe    | -0.811            | -0.218 | -0.477 | 0.569        | -0.386             | -0.460             | 0.305              | Mo2-Fe-CHO                | 0.569       | <b>0.174</b>  | Good                  |
| Mo2/Pt    | -1.385            | -0.059 | -0.925 | 0.785        | -0.964             | -0.506             | 1.576              | Mo2-Pt-CH <sub>3</sub> OH | 1.576       | -0.684        | High RDS barrier      |
| Mo2/Ru    | -0.357            | 0.186  | -0.201 | -0.015       | -0.473             | -0.645             | 0.028              | Mo2-Ru-OCHO               | 0.186       | <b>0.862</b>  | Good                  |
| Mo2/Ni    | -0.433            | -0.524 | -0.212 | 0.461        | -0.627             | -0.654             | 0.510              | Mo2-Ni-CH <sub>3</sub> OH | 0.510       | <b>0.458</b>  | Ni@Ti3 better         |
| Mo3/Co    | 1.407             | -1.524 | -0.199 | 0.459        | -0.433             | -0.633             | -0.555             | Mo3-Co-CO <sub>2</sub>    | 1.407       | <b>1.233</b>  | CO <sub>2</sub> ads   |
| Mo3/Cu    | 1.348             | 0.085  | -1.237 | 1.488        | -1.448             | 0.329              | -2.044             | Mo3-Cu-CHO                | 1.488       | <b>2.416</b>  | High RDS barrier      |
| Mo3/Fe    | 1.410             | -1.822 | -0.195 | 0.676        | -0.724             | -0.772             | -0.050             | Mo3-Fe-CO <sub>2</sub>    | 1.410       | <b>1.120</b>  | CO <sub>2</sub> ads   |
| Mo3/Pt    | 1.238             | -1.300 | -0.747 | 0.448        | 0.328              | -0.433             | -1.011             | Mo3-Pt-CO <sub>2</sub>    | 1.238       | <b>0.650</b>  | CO <sub>2</sub> ads   |
| Mo3/Ru    | 1.543             | -2.070 | -0.163 | 0.277        | -0.233             | -0.793             | -0.039             | Mo3-Ru-CO <sub>2</sub>    | 1.543       | <b>0.612</b>  | CO <sub>2</sub> ads   |
| Mo3/Ni    | -0.417            | -1.044 | -0.529 | 0.535        | -0.510             | -0.346             | 0.833              | Mo3-Ni-CH <sub>3</sub> OH | 0.833       | -0.358        | High RDS barrier      |
| Ti3/Ag    | -0.283            | 0.360  | -1.065 | 1.231        | -0.937             | 0.016              | -0.800             | Ti3-Ag-CHO                | 1.230       | 0.536         | High RDS barrier      |
| Ti3/Pd    | -0.222            | -0.414 | -0.669 | 0.177        | -0.136             | -0.065             | -0.148             | Ti3-Pd-CHO                | 0.177       | 0.067         | Good                  |

**0.513** RDS

■ Unfavourable

■ Favourable, but other catalysts of the same Transition Metal are better

■ Favourable

**Table S2.** \*OCHO vs \*COOH formation.

| Structure          | *OCHO (eV) | *COOH (eV)   | E(*OCHO) > E(*COOH) |
|--------------------|------------|--------------|---------------------|
| Co/Ti <sub>2</sub> | -0.878     | -0.401       | FALSE               |
| Cu/Ti <sub>2</sub> | -0.217     | 0.213        | FALSE               |
| Fe/Ti <sub>2</sub> | -1.357     | -0.652       | FALSE               |
| Pt/Ti <sub>2</sub> | -0.881     | -0.778       | FALSE               |
| Ru/Ti <sub>2</sub> | -1.607     | -1.035       | FALSE               |
| Ni/Ti <sub>2</sub> | -0.249     | 0.222        | FALSE               |
| Co/Ti <sub>3</sub> | -0.852     | -0.412       | FALSE               |
| Cu/Ti <sub>3</sub> | 0.008      | 0.522        | FALSE               |
| Fe/Ti <sub>3</sub> | -1.371     | -0.637       | FALSE               |
| Pt/Ti <sub>3</sub> | -0.362     | -0.262       | FALSE               |
| Ru/Ti <sub>3</sub> | -1.692     | -1.060       | FALSE               |
| Ni/Ti <sub>3</sub> | -0.463     | -0.460       | FALSE               |
| Co/Mo <sub>2</sub> | -0.317     | 0.206        | FALSE               |
| Cu/Mo <sub>2</sub> | -0.385     | 0.338        | FALSE               |
| Fe/Mo <sub>2</sub> | -0.218     | 0.236        | FALSE               |
| Pt/Mo <sub>2</sub> | -0.0593    | 0.0645       | FALSE               |
| Ru/Mo <sub>2</sub> | 0.185      | 0.367        | FALSE               |
| Ni/Mo <sub>2</sub> | -0.524     | 0.168        | FALSE               |
| Co/Mo <sub>3</sub> | -1.523     | <sup>1</sup> |                     |
| Cu/Mo <sub>3</sub> | 0.0851     | 0.581        | FALSE               |
| Fe/Mo <sub>3</sub> | -1.822     |              |                     |
| Pt/Mo <sub>3</sub> | -1.300     |              |                     |
| Ru/Mo <sub>3</sub> | -2.070     |              |                     |
| Ni/Mo <sub>3</sub> | -1.044     | 1.165        | FALSE               |

<sup>1</sup> There are blank slots for catalysts that were screened out early due to high adsorption energy of CO<sub>2</sub>, making them unfavourable regardless of further steps.



**Table S3.** HCOOH desorption versus protonation to form \*CHO.

| Structure          | E <sub>1</sub> (HCOOH* to HCOOH)<br>(eV) | E <sub>2</sub> (HCOOH* to CHO*)<br>(eV) | E <sub>2</sub> > E <sub>1</sub> |
|--------------------|------------------------------------------|-----------------------------------------|---------------------------------|
| Co/Ti <sub>2</sub> | 1.013                                    | -0.197                                  | FALSE                           |
| Cu/Ti <sub>2</sub> | 1.152                                    | 0.946                                   | FALSE                           |
| Fe/Ti <sub>2</sub> | 1.240                                    | -0.073                                  | FALSE                           |
| Pt/Ti <sub>2</sub> | 1.894                                    | 0.193                                   | FALSE                           |
| Ru/Ti <sub>2</sub> | 1.522                                    | -0.059                                  | FALSE                           |
| Ni/Ti <sub>2</sub> | 0.950                                    | 0.599                                   | FALSE                           |
| Co/Ti <sub>3</sub> | 1.460                                    | -0.084                                  | FALSE                           |
| Cu/Ti <sub>3</sub> | 1.623                                    | 1.124                                   | FALSE                           |
| Fe/Ti <sub>3</sub> | 1.797                                    | 0.154                                   | FALSE                           |
| Pt/Ti <sub>3</sub> | 2.025                                    | -0.047                                  | FALSE                           |
| Ru/Ti <sub>3</sub> | 1.972                                    | 0.048                                   | FALSE                           |
| Ni/Ti <sub>3</sub> | 0.988                                    | 0.352                                   | FALSE                           |
| Co/Mo <sub>2</sub> | 1.203                                    | 0.147                                   | FALSE                           |
| Cu/Mo <sub>2</sub> | 1.242                                    | 1.197                                   | FALSE                           |
| Fe/Mo <sub>2</sub> | 1.496                                    | 0.569                                   | FALSE                           |
| Pt/Mo <sub>2</sub> | 2.359                                    | 0.785                                   | FALSE                           |
| Ru/Mo <sub>2</sub> | 0.362                                    | -0.015                                  | FALSE                           |
| Ni/Mo <sub>2</sub> | 1.158                                    | 0.461                                   | FALSE                           |
| Co/Mo <sub>3</sub> | 0.305                                    | 0.459                                   | <b>TRUE</b>                     |
| Cu/Mo <sub>3</sub> | -0.207                                   | 1.487                                   | <b>TRUE</b>                     |
| Fe/Mo <sub>3</sub> | 0.597                                    | 0.676                                   | <b>TRUE</b>                     |
| Pt/Mo <sub>3</sub> | 0.800                                    | 0.449                                   | FALSE                           |
| Ru/Mo <sub>3</sub> | 0.680                                    | 0.277                                   | FALSE                           |
| Ni/Mo <sub>3</sub> | 1.980                                    | 0.535                                   | FALSE                           |

**Table S4.** \*CHOH pathway vs \*OCH<sub>2</sub> pathway.

| Structure          | E (*CHO to *CHOH) (eV) | E (*CHOH to *CH <sub>2</sub> OH) (eV) | E (*CH <sub>2</sub> OH to *CH <sub>3</sub> OH) (eV) | RDS          | Energy of RDS (eV) |
|--------------------|------------------------|---------------------------------------|-----------------------------------------------------|--------------|--------------------|
| Co/Ti <sub>2</sub> | 0.234                  | -1.143                                | 0.651                                               | Ti2-Co-CH3OH | 0.513              |
| Cu/Ti <sub>2</sub> | -0.356                 | -0.674                                | -0.233                                              | Ti2-Cu-CHO   | 0.946              |
| Fe/Ti <sub>2</sub> | -0.047                 | -0.976                                | 0.868                                               | Ti2-Fe-CH3OH | 0.868              |
| Pt/Ti <sub>2</sub> | -0.256                 | -0.581                                | 1.069                                               | Ti2-Pt-CH3OH | 0.803              |
| Ru/Ti <sub>2</sub> | -0.189                 | -0.723                                | 1.025                                               | Ti2-Ru-CH3OH | 0.983              |
| Ni/Ti <sub>2</sub> | -0.215                 | -0.837                                | -0.065                                              | Ti2-Ni-CHO   | 0.600              |
| Co/Ti <sub>3</sub> | 0.052                  | -1.017                                | 1.040                                               | Ti3-Co-CH3OH | 0.830              |
| Cu/Ti <sub>3</sub> | -0.480                 | -0.534                                | 0.051                                               | Ti3-Cu-CHO   | 1.124              |
| Fe/Ti <sub>3</sub> | -0.094                 | -0.968                                | 1.237                                               | Ti3-Fe-CH3OH | 1.237              |
| Pt/Ti <sub>3</sub> | -0.377                 | -0.494                                | 1.475                                               | Pt@Ti3-CH3OH | 0.650              |
| Ru/Ti <sub>3</sub> | -0.171                 | -0.789                                | 1.416                                               | Ti3-Ru-CH3OH | 1.321              |
| Ni/Ti <sub>3</sub> | -0.121                 | -1.404                                | 0.693                                               | Ni@Ti3-CHO   | 0.352              |
| Co/Mo <sub>2</sub> | -0.098                 | -1.105                                | 0.791                                               | Co@Mo2-CH3OH | 0.487              |
| Cu/Mo <sub>2</sub> | -0.864                 | -0.043                                | -0.516                                              | Mo2-Cu-CHO   | 1.197              |
| Fe/Mo <sub>2</sub> | 0.032                  | -0.909                                | 0.336                                               | Fe@Mo2-CHO   | 0.569              |
| Pt/Mo <sub>2</sub> | -1.604                 | 0.619                                 | 1.091                                               | Mo2-Pt-CH3OH | 1.091              |
| Ru/Mo <sub>2</sub> | -0.243                 | -0.915                                | 0.068                                               | Ru@Mo2-OCHO  | 0.186              |
| Ni/Mo <sub>2</sub> | -0.273                 | -1.028                                | 0.530                                               | Mo2-Ni-CH3OH | 0.510              |
| Co/Mo <sub>3</sub> | <sup>2</sup>           |                                       |                                                     | Mo3-Co-CO2   |                    |
| Cu/Mo <sub>3</sub> |                        |                                       |                                                     | Mo3-Cu-CHO   |                    |
| Fe/Mo <sub>3</sub> |                        |                                       |                                                     | Mo3-Fe-CO2   |                    |
| Pt/Mo <sub>3</sub> |                        |                                       |                                                     | Mo3-Pt-CO2   |                    |
| Ru/Mo <sub>3</sub> |                        |                                       |                                                     | Mo3-Ru-CO2   |                    |
| Ni/Mo <sub>3</sub> | 0.067                  | 0.690                                 | -0.779                                              | Mo3-Ni-CH2OH | 0.690              |

<sup>2</sup> There are blank slots for catalysts that were screened out early due to high adsorption energy of CO<sub>2</sub>, making them unfavorable regardless of further steps.

**Table S5.** DFT energy and Gibbs free energy data (eV). E\_DFT is the DFT energy calculated at the ground state. E\_ZPE is the zero-point energy as presented on Eq S3. Cv\_harm is the harmonic heat capacity as defined in Eq S7. The TS term represents the temperature (298K) times the entropy. G is the Gibbs free energy (eV) as presented in Eq S9.

|                                           | <b>E_DFT</b> | <b>E_ZPE</b> | <b>Cv_harm</b> | <b>TS</b> | <b>G</b>   | <b>Extra G term</b> |
|-------------------------------------------|--------------|--------------|----------------|-----------|------------|---------------------|
| <b>Ni@Ti<sub>3</sub>-H<sub>2</sub></b>    | -58102.57    | 0.123        | 0              | 0         | -58102.44  | 0.123               |
| <b>Ni@Ti<sub>3</sub>-CO<sub>2</sub></b>   | -59115.76    | 0.378        | 0.078          | -0.133    | -59115.44  | 0.323               |
| <b>Ni@Ti<sub>3</sub>-OCHO</b>             | -59132.03    | 0.673        | 0.073          | -0.123    | -59131.41  | 0.623               |
| <b>Ni@Ti<sub>3</sub>-HCOOH</b>            | -59148.06    | 0.987        | 0.09           | -0.156    | -59147.14  | 0.921               |
| <b>Ni@Ti<sub>3</sub>-CHO</b>              | -58694.95    | 0.498        | 0.067          | -0.121    | -58694.51  | 0.443               |
| <b>Ni@Ti<sub>3</sub>-OCH<sub>2</sub></b>  | -58711.18    | 0.785        | 0.074          | -0.153    | -58710.48  | 0.706               |
| <b>Ni@Ti<sub>3</sub>-OCH<sub>3</sub></b>  | -58727.07    | 1.102        | 0.078          | -0.176    | -58726.06  | 1.005               |
| <b>Ni@Ti<sub>3</sub>-CH<sub>3</sub>OH</b> | -58744.40    | 1.457        |                | -0.151    | -58743.02  | 1.388               |
| <b>Ni@Ti<sub>3</sub>-COOH</b>             | -59131.73    | 0.68         | 0.072          | -0.113    | -59131.09  | 0.64                |
| <b>Ni@Ti<sub>3</sub>-CHOH</b>             | -58710.88    | 0.84         | 0.066          | -0.111    | -58710.08  | 0.795               |
| <b>Ni@Ti<sub>3</sub>-COH</b>              | -58694.17    |              |                |           |            |                     |
| <b>Ni@Ti<sub>3</sub>-CH<sub>2</sub></b>   | -58273.76    | 0.606        | 0.024          | -0.036    | -58273.168 | 0.594               |
| <b>Ni@Ti<sub>3</sub>-CH<sub>3</sub></b>   | -58291.09    | 0.918        | 0.039          | -0.078    | -58290.211 | 0.88                |
| <b>Ni@Ti<sub>3</sub>-O</b>                | -58522.06    | 0.08         | 0.029          | -0.049    | -58522.002 | 0.061               |
| <b>Ni@Ti<sub>3</sub>-OH</b>               | -58540.24    | 0.364        | 0.044          | -0.071    | -58539.906 | 0.336               |
| <b>Ni@Ti<sub>3</sub>-H<sub>2</sub>O</b>   | -58557.48    | 0.685        | 0.067          | -0.12     | -58556.846 | 0.631               |
| <b>Ni@Ti<sub>3</sub>-CO</b>               | -58679.81    | 0.232        | 0.052          | -0.083    | -58679.614 | 0.201               |
| <b>Ni@Ti<sub>3</sub>-CH<sub>4</sub></b>   | -58308.25    | 1.211        | 0.069          | -0.147    | -58307.119 | 1.132               |
| <b>Pt@Ti<sub>3</sub>-H<sub>2</sub></b>    | -56766.71    | 0.225        | 0.008          | -0.011    | -56766.489 | 0.222               |
| <b>Pt@Ti<sub>3</sub>-CO<sub>2</sub></b>   | -57778.77    | 0.332        | 0.063          | -0.114    | -57778.495 | 0.281               |
| <b>Pt@Ti<sub>3</sub>-OCHO</b>             | -57794.65    | 0.68         | 0.07           | -0.117    | -57794.016 | 0.633               |
| <b>Pt@Ti<sub>3</sub>-HCOOH</b>            | -57810.92    | 0.953        | 0.061          | -0.101    | -57810.008 | 0.913               |
| <b>Pt@Ti<sub>3</sub>-CHO</b>              | -57358.21    | 0.492        | 0.03           | -0.048    | -57357.739 | 0.474               |
| <b>Pt@Ti<sub>3</sub>-OCH<sub>2</sub></b>  | -57373.94    | 0.796        | 0.044          | -0.072    | -57373.175 | 0.767               |
| <b>Pt@Ti<sub>3</sub>-OCH<sub>3</sub></b>  | -57389.87    | 1.108        | 0.078          | -0.156    | -57388.847 | 1.029               |
| <b>Pt@Ti<sub>3</sub>-CH<sub>3</sub>OH</b> | -57406.70    | 1.46         | 0.105          | -0.228    | -57405.37  | 1.336               |
| <b>Pt@Ti<sub>3</sub>-COOH</b>             | -57794.84    | 0.639        | 0.052          | -0.084    | -57794.241 | 0.607               |
| <b>Pt@Ti<sub>3</sub>-O</b>                | -57184.48    | 0.068        | 0.016          | -0.027    | -57184.43  | 0.057               |
| <b>Pt@Ti<sub>3</sub>-OH</b>               | -57202.89    | 0.362        |                | -0.046    | -57202.55  | 0.343               |
| <b>Pt@Ti<sub>3</sub>-H<sub>2</sub>O</b>   | -57219.57    | 0.697        |                | -0.117    | -57218.931 | 0.642               |
| <b>Pt@Ti<sub>3</sub>-CO</b>               | -57343.25    | 0.23         | 0.035          | -0.059    | -57343.041 | 0.206               |
| <b>Pt@Ti<sub>3</sub>-CH<sub>4</sub></b>   | -56970.83    | 1.194        | 0.091          | -0.192    | -56969.74  | 1.093               |

|              |           |       |       |        |            |       |
|--------------|-----------|-------|-------|--------|------------|-------|
| Pd@Ti3-CO2   | -57971.23 | 0.393 | 0.07  | -0.113 | -57970.886 | 0.349 |
| Pd@Ti3-OCHO  | -57987.46 | 0.675 |       | -0.12  | -57986.831 | 0.626 |
| Pd@Ti3-HCOOH | -58003.94 | 0.974 | 0.085 | -0.142 | -58003.02  | 0.915 |
| Pd@Ti3-COOH  | -57987.55 | 0.668 | 0.079 | -0.128 | -57986.932 | 0.618 |
| Pd@Ti3-CO    | -57535.13 | 0.226 |       | -0.091 | -57534.944 | 0.19  |
| Pd@Ti3-CHO   | -57551.00 | 0.51  |       | -0.111 | -57550.542 | 0.461 |
| Pd@Ti3-OCH2  | -57566.95 | 0.809 |       |        | -57566.218 | 0.730 |
| Pd@Ti3-OCH3  | -57582.82 | 1.115 | 0.088 | -0.179 | -57581.798 | 1.024 |
| Pd@Ti3-CH3OH | -57599.62 | 1.444 |       |        | -57598.265 | 1.357 |
| Pd@Ti3-CH4   | -57163.84 | 1.212 | 0.09  | -0.206 | -57162.754 | 1.095 |
| Pd@Ti3-O     | -57377.40 | 0.079 |       | -0.043 | -57377.338 | 0.063 |
| Pd@Ti3-H2    | -56959.37 |       |       |        | -56959.165 | 0.202 |
| Pd@Ti3-OH    | -57395.62 | 0.346 | 0.058 | -0.124 | -57395.335 | 0.280 |
| Pd@Ti3-H2O   | -57413.12 | 0.694 | 0.059 | -0.097 | -57412.465 | 0.655 |
| Ru@Mo2-H2    | -45274.55 | 0.224 | 0.005 | -0.007 | -45274.33  | 0.223 |
| Ru@Co@Mo22   | -46287.49 | 0.375 | 0.085 | -0.214 | -46287.24  | 0.246 |
| Ru@Mo2-OCHO  | -46303.11 | 0.635 | 0.047 | -0.077 | -46302.5   | 0.606 |
| Ru@Mo2-HCOOH | -46319.12 | 0.934 | 0.105 | -0.215 | -46318.295 | 0.823 |
| Ru@Mo2-CHO   | -45866.38 | 0.495 | 0.026 | -0.04  | -45865.897 | 0.481 |
| Ru@Mo2-OCH2  | -45882.66 | 0.805 | 0.081 | -0.155 | -45881.928 | 0.732 |
| Ru@Mo2-OCH3  | -45899.11 | 1.124 | 0.091 | -0.185 | -45898.084 | 1.03  |
| Ru@Mo2-CH3OH | -45915.27 | 1.452 | 0.105 | -0.211 | -45913.927 | 1.346 |
| Ru@Co@Mo2OH  | -46302.92 | 0.641 | 0.049 | -0.075 | -46302.312 | 0.615 |
| Ru@Mo2-O     | -45694.91 | 0.078 | 0.034 | -0.064 | -45694.869 | 0.048 |
| Ru@Mo2-OH    | -45712.15 | 0.362 | 0.045 | -0.074 | -45711.822 | 0.333 |
| Mor-Ru-H2O   | -45728.63 | 0.693 | 0.059 | -0.097 | -45727.983 | 0.654 |
| Ru@Co@Mo2    | -45850.24 | 0.222 | 0.057 | -0.101 | -45850.068 | 0.179 |
| Ru@Mo2-CH4   | -45479.75 | 1.25  | 0.106 | -0.26  | -45478.656 | 1.095 |
| Co@Mo2-H2    | -46656.02 | 0.21  | 0.008 | -0.011 | -46655.816 | 0.207 |
| Co@Mo2-CO2   | -47668.67 | 0.381 | 0.08  | -0.145 | -47668.359 | 0.316 |
| Co@Mo2-OCHO  | -47684.80 | 0.677 | 0.079 | -0.148 | -47684.194 | 0.607 |
| Co@Mo2-HCOOH | -47700.58 | 0.955 | 0.064 | -0.111 | -47699.679 | 0.906 |
| Co@Mo2-CHO   | -47247.68 | 0.493 | 0.071 | -0.154 | -47247.274 | 0.409 |
| Co@Mo2-OCH2  | -47263.75 | 0.792 | 0.067 | -0.124 | -47263.02  | 0.734 |
| Co@Mo2-OCH3  | -47280.19 | 1.113 | 0.095 | -0.199 | -47279.191 | 1.008 |
| Co@Mo2-CH3OH | -47296.69 | 1.463 | 0.081 | -0.15  | -47295.303 | 1.394 |
| Co@Mo2-COOH  | -47684.27 | 0.646 | 0.049 | -0.078 | -47683.661 | 0.616 |
| Co@Mo2-O     | -47075.43 | 0.07  | 0.036 | -0.068 | -47075.398 | 0.038 |
| Co@Mo2-OH    | -47093.36 | 0.38  | 0.038 | -0.06  | -47093.011 | 0.358 |
| Co@Mo2-CO    | -47231.96 | 0.24  | 0.048 | -0.076 | -47231.753 | 0.212 |

|              |               |       |       |        |            |       |
|--------------|---------------|-------|-------|--------|------------|-------|
| Co@Mo2-H2O   | -47110.55     | 0.699 | 0.047 | -0.073 | -47109.878 | 0.672 |
| Co@Mo2-CH4   | -46860.98     | 1.269 | 0.094 | -0.208 | -46859.834 | 1.155 |
| Fe@Mo2-H2    | -46060.21     | 0.217 | 0.006 | -0.008 | -46060.004 | 0.214 |
| Fe@Mo2-CO2   | 47072.91<br>7 | 0.392 | 0.078 | -0.141 | -47072.589 | 0.328 |
| Fe@Mo2-OCHO  | -47088.94     | 0.643 | 0.091 | -0.196 | -47088.406 | 0.538 |
| Fe@Mo2-HCOOH | -47105.22     | 0.965 | 0.08  | -0.141 | -47104.325 | 0.904 |
| Fe@Mo2-CHO   | -46651.90     | 0.525 | 0.042 | -0.075 | -46651.414 | 0.490 |
| Fe@Mo2-OCH2  | -46668.10     | 0.782 | 0.073 | -0.146 | -46667.392 | 0.707 |
| Fe@Mo2-OCH3  | -46684.37     | 1.119 | 0.093 | -0.188 | -46683.346 | 1.022 |
| Fe@Mo2-CH3OH | -46701.14     | 1.462 | 0.09  | -0.17  | -46699.759 | 1.382 |
| Fe@Mo2-COOH  | -47088.49     | 0.636 | 0.053 | -0.096 | -47087.897 | 0.593 |
| Fe@Mo2-O     | -46480.62     | 0.074 | 0.037 | -0.076 | -46480.584 | 0.035 |
| Fe@Mo2-OH    | -46498.04     | 0.361 | 0.027 | -0.041 | -46497.692 | 0.346 |
| Fe@Mo2-CO    | -46636.29     | 0.234 | 0.051 | -0.082 | -46636.086 | 0.203 |
| Fe@Mo2-H2O   | -46515.08     | 0.707 | 0.042 | -0.063 | -46514.394 | 0.684 |
| Fe@Mo2-CH4   | -46265.19     | 1.269 | 0.075 | -0.164 | -46264.014 | 1.180 |

**Table S6.** Key Gibbs free energy differences for drawing conclusions on product selectivity.

|        | End Products  |           |           | COOH vs OCHO |             |            | Intermediate Products             |           |        |          |
|--------|---------------|-----------|-----------|--------------|-------------|------------|-----------------------------------|-----------|--------|----------|
|        | CH3OH*=>CH3OH | CH4*=>CH4 | H2O*=>H2O | Conclusion   | CO2*->OCHO* | CO2=>COOH* | Conclusion                        | HCOOH des | CO des | OCH2 des |
| Ni@Ti3 | 0.33          | 0.01      | 0.24      | Methane      | -0.12       | 0.20       | OCHO,HCOOH                        | 0.10      | 1.67   | 0.32     |
| Pt@Ti3 | 0.86          | 0.80      | 0.50      | H2           | 0.33        | 0.11       | COOH,CO                           | 1.15      | 3.27   | 1.20     |
| Ru@Mo2 | -0.44         | -0.14     | -0.30     | Methanol     | 0.59        | 0.78       | OCHO=>HCOOH                       | -0.43     | 0.44   | 0.09     |
| Pd@Ti3 | 0.01          | 0.07      | 0.29      | Methanol     | -0.09       | -0.19      | Both possible, CO more favourable | 0.42      | 1.43   | 0.49     |
| Co@Mo2 | 0.31          | 0.41      | 0.96      | Methanol     | 0.02        | 0.55       | OCHO,HCOOH                        | 0.30      | 1.50   | 0.55     |
| Fe@Mo2 | 0.41          | 0.24      | 1.13      | Methanol     | 0.04        | 0.55       | OCHO , HCOOH                      | 0.63      | 1.48   | 0.57     |

**Table S7** Example of the six final catalysts that have been previously synthesized in experiments

| Identified Catalysts | Structure synthesized                                                                                  | Applications                                               |
|----------------------|--------------------------------------------------------------------------------------------------------|------------------------------------------------------------|
| Ni @Ti <sub>3</sub>  | NiO on Ti <sub>3</sub> C <sub>2</sub> [5]<br>Ni SAC on O-terminated Ti <sub>3</sub> C <sub>2</sub> [6] | Supercapacitor<br>Hydrazine oxidation                      |
| Pd @Ti <sub>3</sub>  | Pd SAC on Nb <sub>2</sub> CT <sub>2</sub> (T= O, F, and OH) [7]                                        | OER, ORR                                                   |
| Pt @ Ti <sub>3</sub> | Pt SAC on O-terminated Ti <sub>3</sub> C <sub>2</sub> [8,9]                                            | CO <sub>2</sub> functionalization, Aniline conversion, HER |
| Ru @ Mo <sub>2</sub> | Ru SAC on O-terminated Mo <sub>2</sub> C [10,11]                                                       | Nitrogen Reduction Reaction, HER                           |

|                     |                                                                  |                        |
|---------------------|------------------------------------------------------------------|------------------------|
| Co @Mo <sub>2</sub> | Co SAC on O-terminated Mo <sub>2</sub> [12]                      | OER and HER            |
| Fe @Mo <sub>2</sub> | Fe SAC on Mo <sub>2</sub> CT <sub>2</sub> (T= O, F, and OH) [13] | Micropollutant removal |

## References

1. J. K. Nørskov, J. Rossmeisl, A. Logadottir, L. Lindqvist, J. R. Kitchin, T. Bligaard and H. Jónsson, *The Journal of Physical Chemistry B*, 2004, **108**, 17886-17892.
2. E. Sargeant, F. Illas, P. Rodríguez and F. Calle-Vallejo, *Journal of Electroanalytical Chemistry*, 2021, **896**, 115178.
3. M. W. Chase, *NIST – JANAF Thermochemical Tables, 4th Edition*, 1998.
4. A. Hjorth Larsen, J. Jørgen Mortensen, J. Blomqvist, I. E. Castelli, R. Christensen, M. Dułak, J. Friis, M. N. Groves, B. Hammer, C. Hargus, E. D. Hermes, P. C. Jennings, P. Bjerre Jensen, J. Kermode, J. R. Kitchin, E. Leonhard Kolsbjerg, J. Kubal, K. Kaasbjerg, S. Lysgaard, J. Bergmann Maronsson, T. Maxson, T. Olsen, L. Pastewka, A. Peterson, C. Rostgaard, J. Schiøtz, O. Schütt, M. Strange, K. S. Thygesen, T. Vegge, L. Vilhelmsen, M. Walter, Z. Zeng and K. W. Jacobsen, *J Phys Condens Matter*, 2017, **29**, 273002.
5. Q. X. Xia, J. Fu, J. M. Yun, R. S. Mane and K. H. Kim, *RSC Advances*, 2017, **7**, 11000-11011.
6. S. Zhou, Y. Zhao, R. Shi, Y. Wang, A. Ashok, F. Héraly, T. Zhang and J. Yuan, *Advanced Materials*, 2022, **34**, 2204388.
7. D. Kan, D. Wang, X. Zhang, R. Lian, J. Xu, G. Chen and Y. Wei, *Journal of Materials Chemistry A*, 2020, **8**, 3097-3108.
8. D. Zhao, Z. Chen, W. Yang, S. Liu, X. Zhang, Y. Yu, W.-C. Cheong, L. Zheng, F. Ren, G. Ying, X. Cao, D. Wang, Q. Peng, G. Wang and C. Chen, *Journal of the American Chemical Society*, 2019, **141**, 4086-4093.
9. J. Zhang, E. Wang, S. Cui, S. Yang, X. Zou and Y. Gong, *Nano Letters*, 2022, **22**, 1398-1405.
10. W. Peng, M. Luo, X. Xu, K. Jiang, M. Peng, D. Chen, T.-S. Chan and Y. Tan, *Advanced Energy Materials*, 2020, **10**, 2001364.
11. Y. Zou, S. A. Kazemi, G. Shi, J. Liu, Y. Yang, N. M. Bedford, K. Fan, Y. Xu, H. Fu, M. Dong, M. Al-Mamun, Y. L. Zhong, H. Yin, Y. Wang, P. Liu and H. Zhao, *EcoMat*, 2023, **5**, e12274.
12. Z. Kou, W. Zang, W. Pei, L. Zheng, S. Zhou, S. Zhang, L. Zhang and J. Wang, *Journal of Materials Chemistry A*, 2020, **8**, 3071-3082.
13. L. Jin, S. You, N. Ren, B. Ding and Y. Liu, *Environmental Science & Technology*, 2022, **56**, 11750-11759.
